# Supplementary material for: Gemcitabine-induced heparanase promotes aggressiveness of pancreatic cancer cells via activating EGFR signaling
Source: PubMed Central journal article supplement (PMC5601663; doi:10.18632/oncotarget.16911), 2017-04-07
Supplement: oncotarget-08-58417-s001.pdf [file oncotarget-08-58417-s001.pdf]

## Gemcitabine-induced heparanase promotes aggressiveness of pancreatic cancer cells via activating EGFR signaling

### SUPPLEMENTARY FIGURES AND TABLE

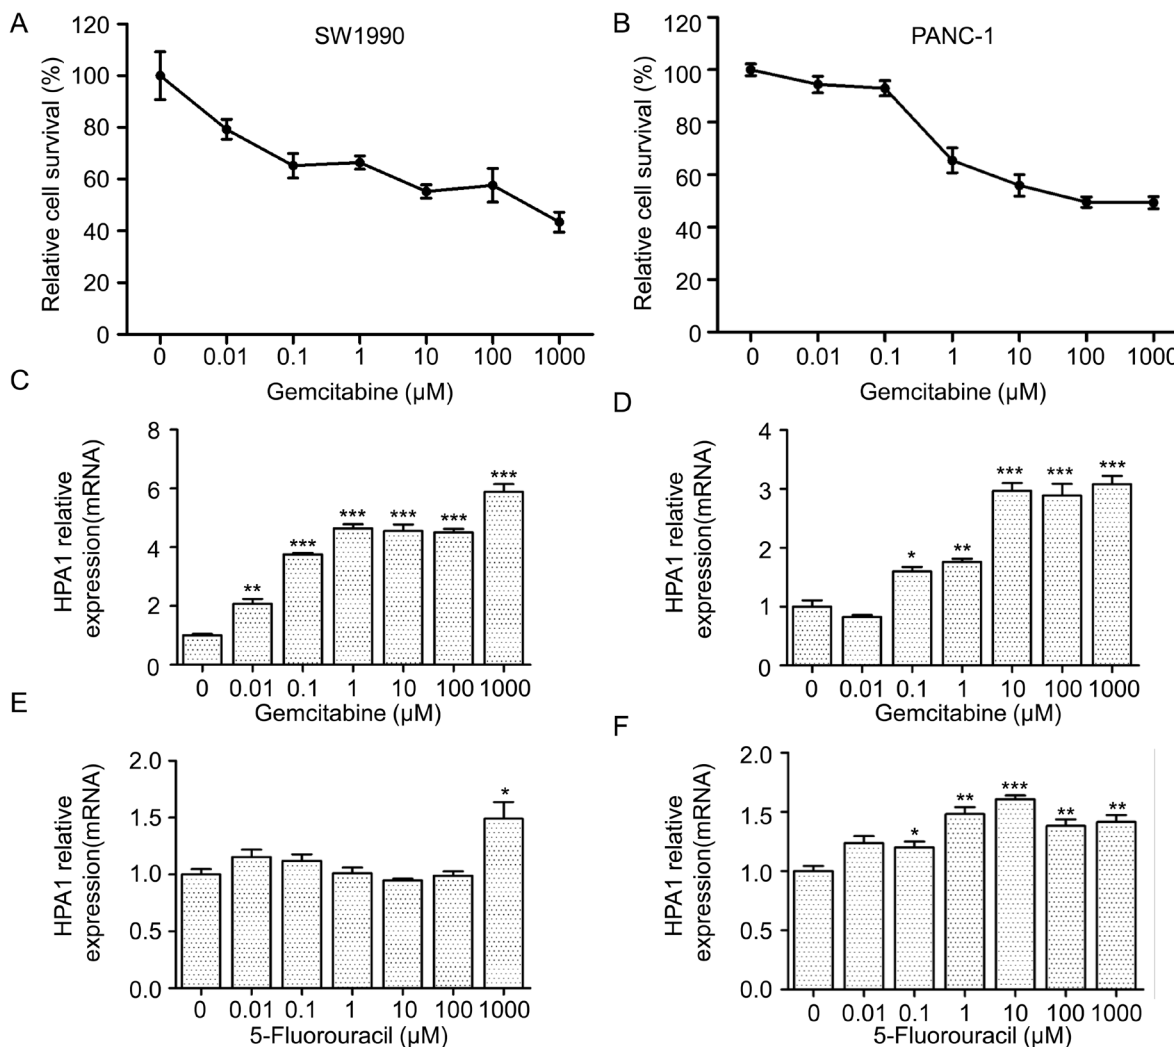

**Supplementary Figure 1: Gemcitabine and 5-Fluorouracil promote the expression of HPA1 *in vitro*.** (A) SW1990 and (B) PANC-1 cells were treated with 0.1–1000 μM gemcitabine for 48 h, and the relative survival rate was detected by CCK-8 assay. The mRNA expression of HPA1 in (C) SW1990 and (D) PANC-1 cells were determined by qRT-PCR after various concentrations of gemcitabine treatment for 48 h. The mRNA expression of HPA1 in (E) SW1990 and (F) PANC-1 cells were determined by qRT-PCR after various concentrations of 5-Fluorouracil treatment for 48 h. \*p < 0.05, \*\*\*p < 0.001.

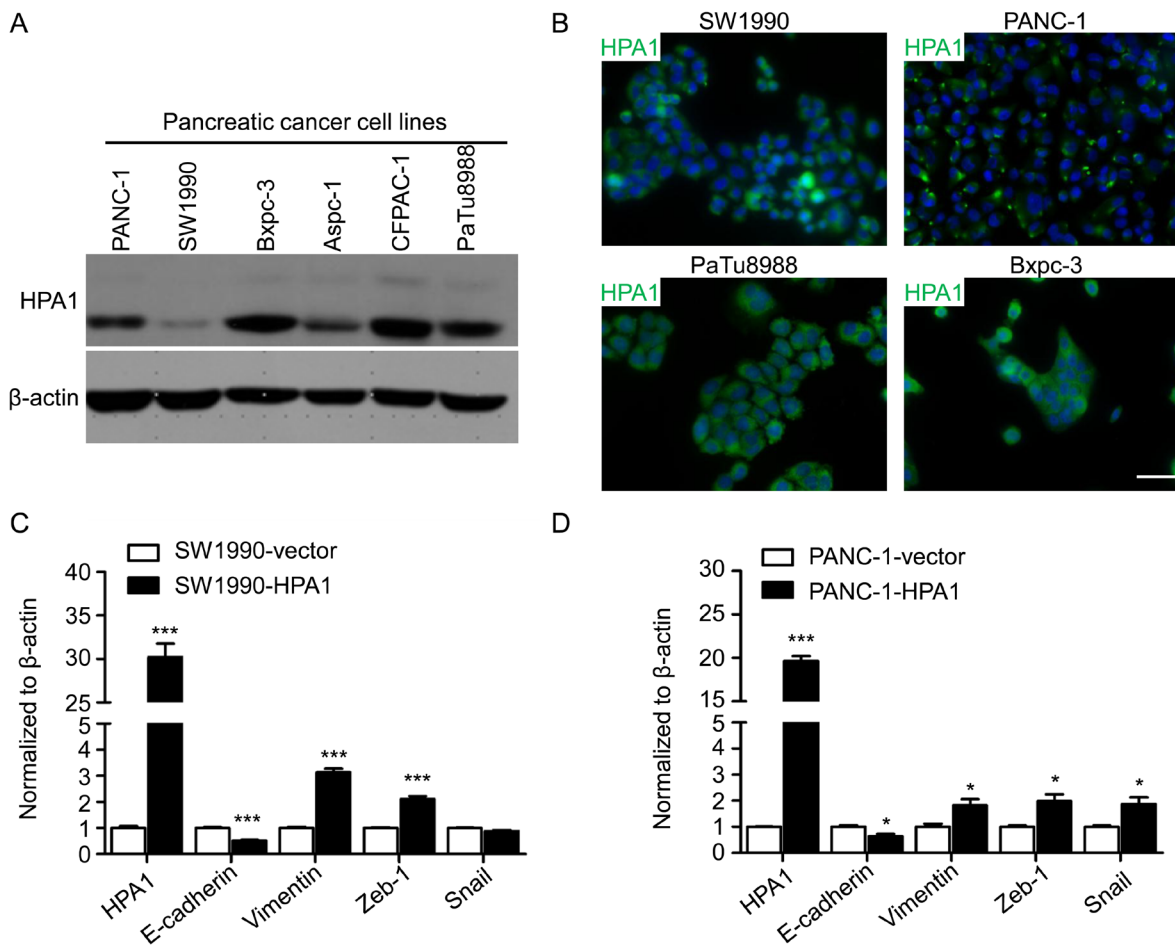

**Supplementary Figure 2: The expression and location of HPA1 in PC cell lines.** (A) Western blot analysis of HPA1 expression in human pancreatic cancer cell lines. (B) Immunofluorescence was used to determine the localization of HPA1 in PC cell lines. (C) The mRNA expression of HPA1, E-cadherin, Vimentin, Zeb-1 and Snail were determined using qRT-PCR in HPA1 overexpressing (C) SW1990 and (D) PANC-1 cells. Scale bar, 50 μm. \*p < 0.05, \*\*p < 0.01, \*\*\*p < 0.001.

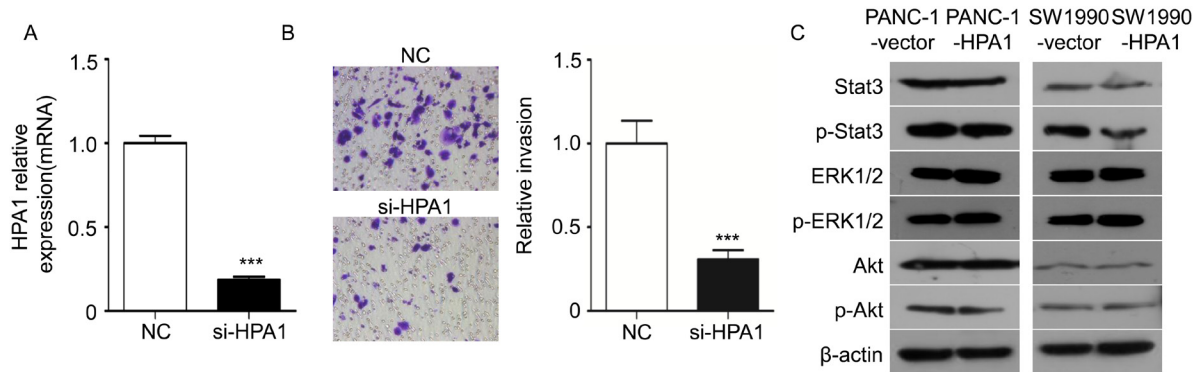

**Supplementary Figure 3: Knock-down of HPA1 inhibit invasion of PANC-1 cells.** PANC-1 cells were transfected with negative control (NC) siRNA and siRNA targeting HPA1 (si-HPA1). **(A)** Expression of HPA1 detected by qRT-PCR. **(B)** Invasive ability was determined by transwell invasion assay. **(C)** The expression of p-Stat3, Stat3, p-ERK1/2, ERK1/2, p-Akt and Akt in PANC-1 and SW1990 cells overexpressing HPA1 were determined by western blot.

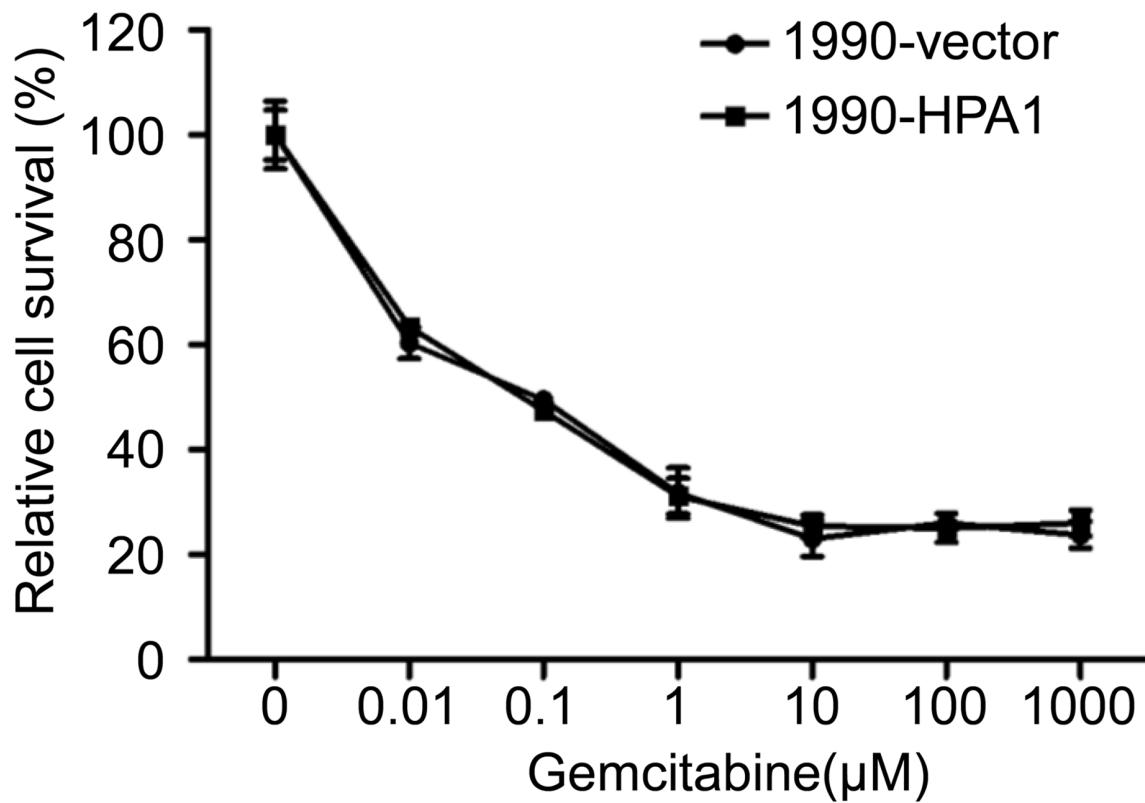

**Supplementary Figure 4: Comparison of gemcitabine sensitivity between SW1990-vector and SW1990-HPA1 cells.** SW1990-vector and SW1990-HPA1 cells were treated with 0.1–1000 μM gemcitabine for 48 h and the relative survival rate was determined by CCK-8 assay.

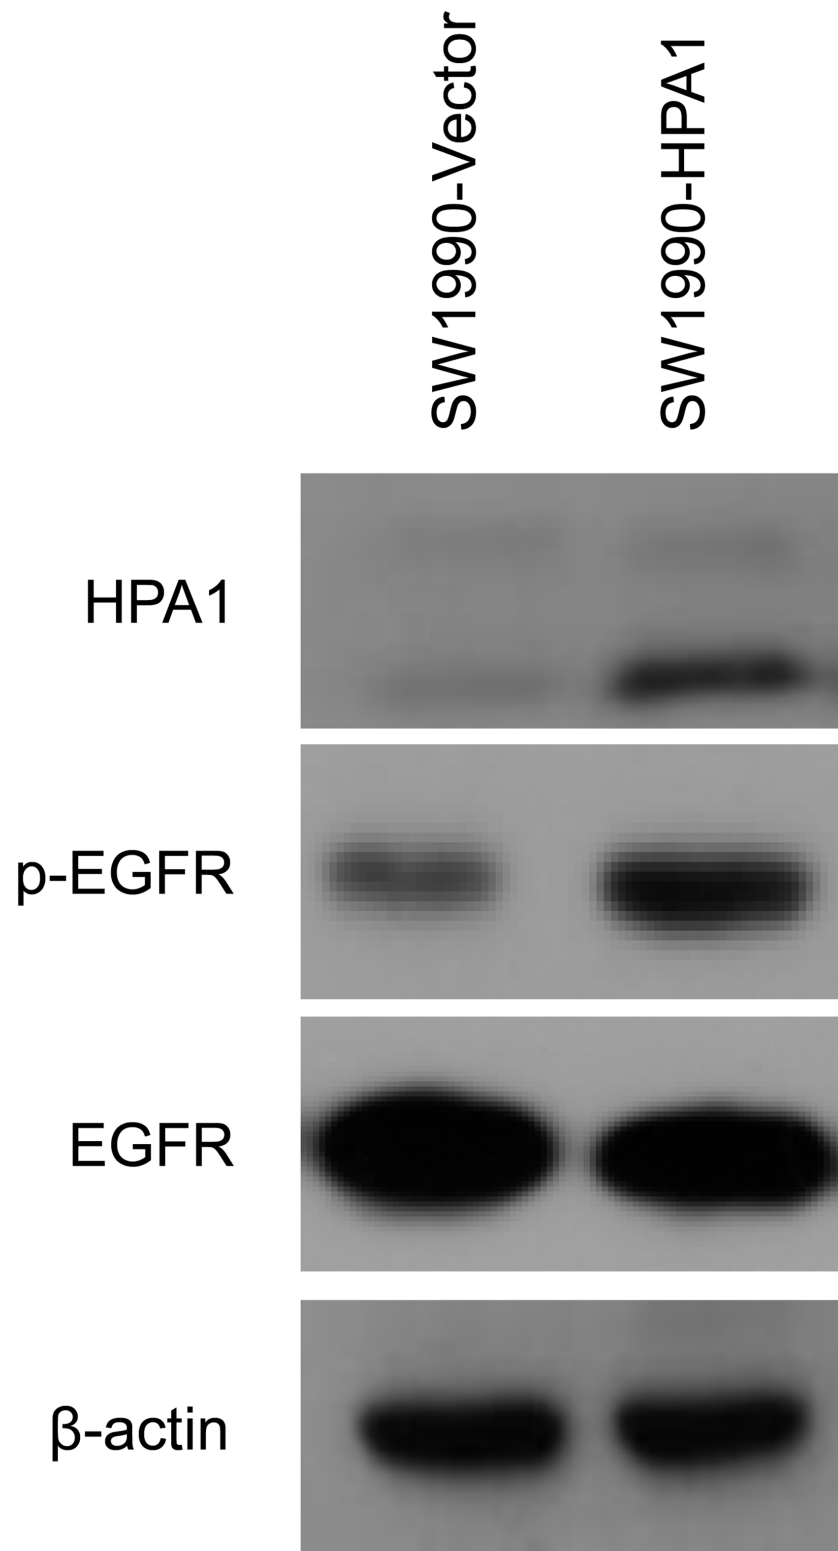

**Supplementary Figure 5: Validation of HPA1 expression of the xenografts.** Western blot analysis was used to detect HPA1, p-EGFR and EGFR expression in SW1990-vector and SW1990-HPA1 xenografts.

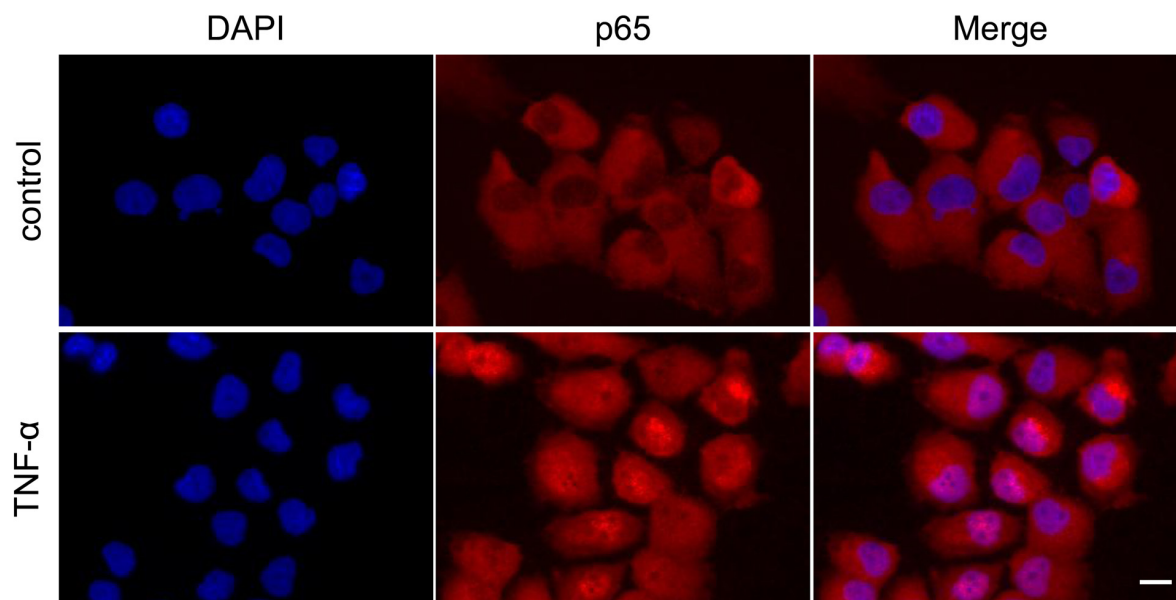

**Supplementary Figure 6: TNF- $\alpha$  activated NF- $\kappa$ B signaling pathway.** PANC-1 cells were treated with TNF- $\alpha$  (30 ng/ml) for 1 h and immunofluorescence analysis showed that TNF- $\alpha$  promoted nuclear translocation of p65. Scale bar, 20  $\mu$ m.

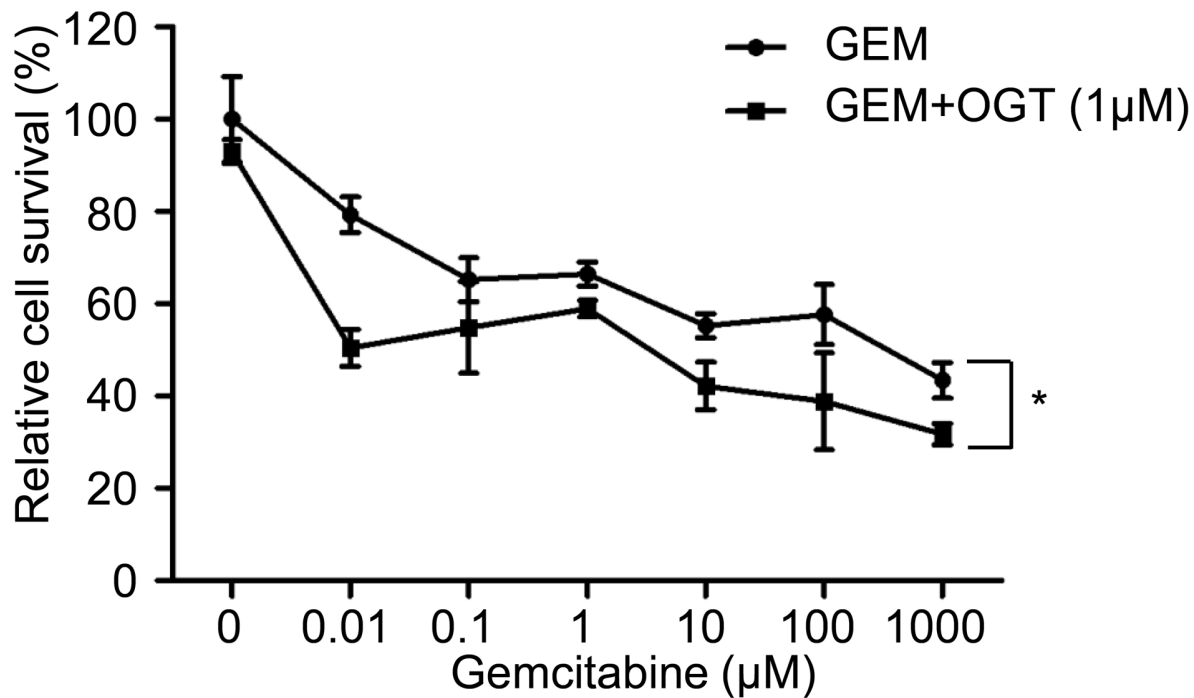

**Supplementary Figure 7: Synergistic effects of OGT2115 and gemcitabine co-treatment on SW1990 cells.** SW1990 cells were treated with different concentrations of gemcitabine alone or in combination with 1 μM OGT2115. Relative cell survival was measured by CCK-8 assay. \*p < 0.05.

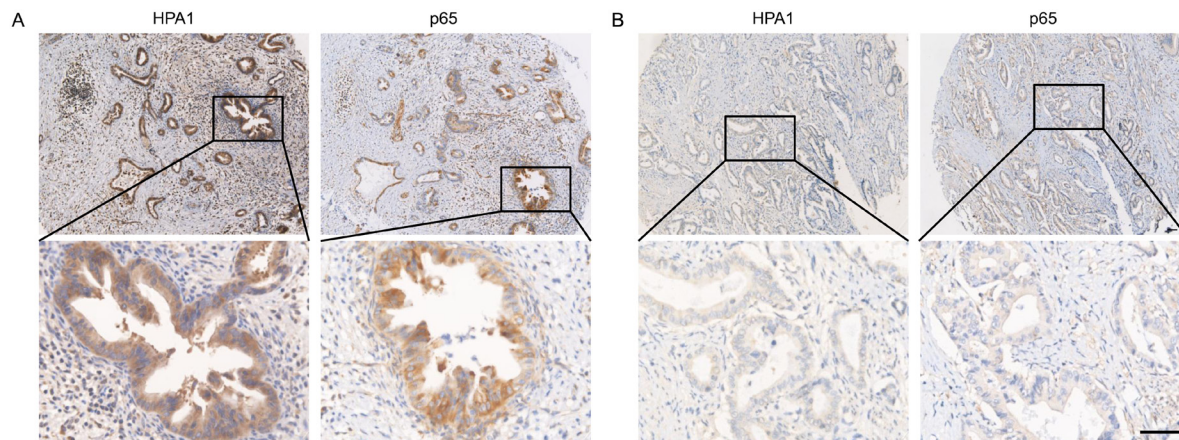

**Supplementary Figure 8: Immunohistochemistry staining of p65 and HPA1.** (A) Representative immunohistochemistry images with intense HPA1 (*left panel*) and p65 (*right panel*) staining. (B) Representative immunohistochemistry images with weak HPA1 (*left panel*) and p65 (*right panel*) staining. Scale bar, 50  $\mu$ m.



Supplementary Table 1: The primers used in the present study

| Primer's name    | Sequence               | Product length |
|------------------|------------------------|----------------|
| HPA1-F           | TACCTTCATTGCACAAACACTG | 88             |
| HPA1-R           | ACTTGGTGACATTATGGAGGTT |                |
| $\beta$ -actin-F | CCTGTACGCCAACACAGTGC   | 211            |
| $\beta$ -actin-R | ATACTCCTGCTTGCTGATCC   |                |
| E-cadherin-F     | CCCACCACGTACAAGGGTC    | 176            |
| E-cadherin-R     | ATGCCATCGTTGTTCACTGGA  |                |
| Vimintin-F       | TACAGGAAGCTGCTGGAAGG   | 104            |
| Vimintin-R       | ACCAGAGGGAGTGAATCCAG   |                |
| Zeb-1-F          | ACCCTTGAAAGTGATCCAGC   | 142            |
| Zeb-1-R          | CATTCCATTTTCTGTCTTCCGC |                |
| Snail-F          | ACCACTATGCCGCGCTCTT    | 115            |
| Snail-R          | GGTCGTAGGGCTGCTGGAA    |                |
